# Supplementary material for: RibU is an essential determinant of Listeria pathogenesis that mediates acquisition of FMN and FAD during intracellular growth
Source: PubMed Central journal article supplement — Proc Natl Acad Sci U S A. 2022 Mar 22;119(13):e2122173119. doi: 10.1073/pnas.2122173119 (PMC9060500; doi:10.1073/pnas.2122173119), 2022-03-22
Supplement: pnas.2122173119.sapp.pdf [file pnas.2122173119.sapp.pdf]

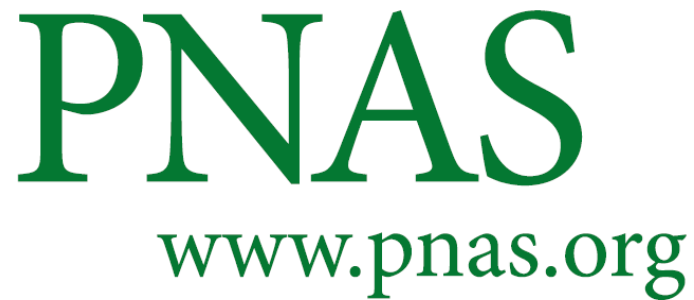

## Supplementary Information for

### **RibU is an essential determinant of *Listeria* pathogenesis that mediates acquisition of FMN and FAD during intracellular growth**

Rafael Rivera-Lugo<sup>a</sup>, Samuel H. Light<sup>a,1</sup>, Nicholas E. Garelis<sup>a</sup>, and Daniel A. Portnoy<sup>a, b, \*</sup>

<sup>a</sup>Department of Molecular and Cell Biology, University of California, Berkeley, Berkeley, CA 94720.

<sup>b</sup>Department of Plant and Microbial Biology, University of California, Berkeley, Berkeley, CA 94720.

<sup>1</sup>Present address: Department of Microbiology, University of Chicago, Chicago, IL 60607.

\*Corresponding author: Daniel A. Portnoy

Email: [portnoy@berkeley.edu](mailto:portnoy@berkeley.edu)

#### **This PDF file includes:**

Figures S1 to S3  
Tables S1  
SI References

## Supplementary Information Figures

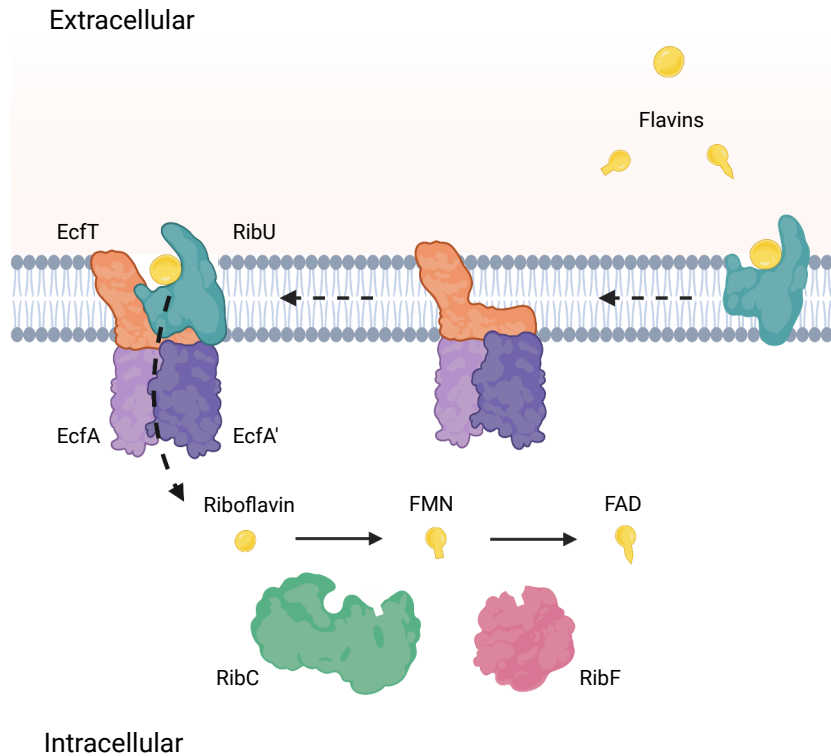

**Fig. S1. Flavin metabolism in *L. monocytogenes*.** *L. monocytogenes* encodes the energy-coupling factor (ECF) transporter RibU which is composed of four subunits: RibU, the substrate binding subunit; EcfT, the transmembrane coupling subunit; and EcfA and EcfA', two ATPase subunits. RibU binds and transports riboflavin, as well as FMN and FAD (this study). The RibU subunit is dissociated in the membrane in its flavin unbound form and upon capturing a flavin molecule it interacts with the transport module (EcfT:EcfA:EcfA') to import the flavin across the membrane using energy from ATP hydrolysis (1). Upon riboflavin import, the bifunctional enzyme RibC catalyzes the phosphorylation of riboflavin to generate FMN and the conversion of FMN to FAD by attaching an adenosine monophosphate molecule (adenylation) to FMN. The enzyme RibF can also adenylate FMN to synthesize FAD (2, 3).

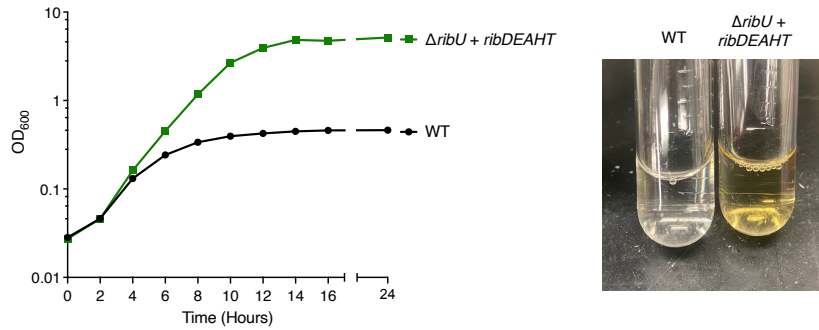

**Fig. S2. The  $\Delta ribU$  strain producing riboflavin grows in chemically defined media lacking flavins.** Broth growth curve of *L. monocytogenes* strains grown in chemically defined media lacking flavins. OD<sub>600</sub> was used to determine cell density. The data show the means and standard deviations of three independent experiments. In chemically defined media lacking flavins, wild-type *L. monocytogenes* grows until it depletes its flavin pool. In contrast, the  $\Delta ribU + ribDEAHT$  strain grows to higher densities. The picture shows the media supernatant of wild-type (left) and the  $\Delta ribU + ribDEAHT$  strain (right) after 24 h of growth at 37 °C shaking. The change in color from colorless to bright yellow, the natural color of flavins, suggests the  $\Delta ribU + ribDEAHT$  strain is producing riboflavin and allowing it to grow in media lacking flavins.

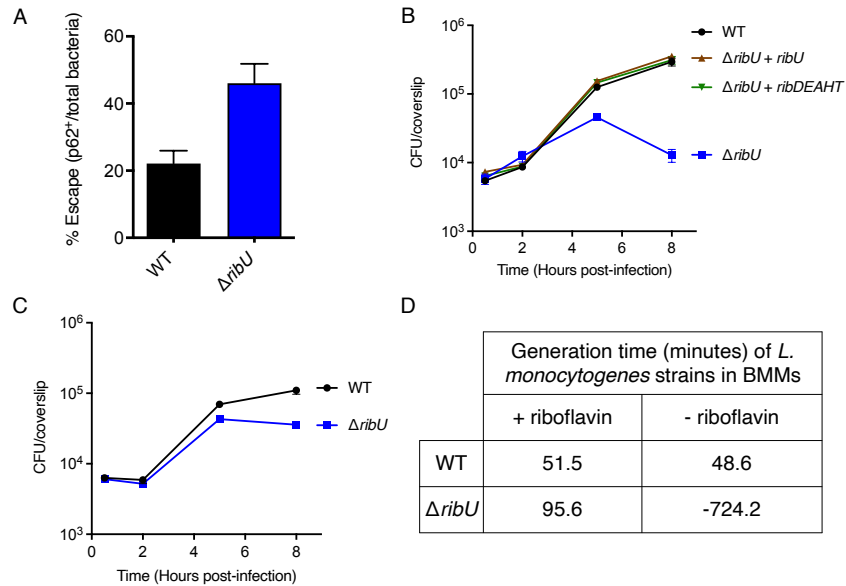

**Fig. S3. Growth dynamics of the  $\Delta ribU$  mutant in BMMs.** (A) Percentage of bacteria that colocalized with the autophagy receptor p62 in infected BMMs. In BMMs treated with cytochalasin D, bacteria that escape phagosomes are tagged with p62. Percent phagosomal escape is calculated by counting the number of p62<sup>+</sup> bacteria of total bacteria. The data show the means and standard errors of the mean of two independent experiments. (B-C) Intracellular growth curves of *L. monocytogenes* strains in BMMs. BMMs were infected at an MOI of 0.1 and CFUs were enumerated at the indicated times. (B) Intracellular growth curve of indicated *L. monocytogenes* strains in wild-type BMMs. The data show the means and standard errors of the mean of two independent experiments. (C) Intracellular growth curve of indicated flavin-starved *L. monocytogenes* strains in riboflavin-deprived wild-type BMMs (for 3 h) supplemented with 1  $\mu$ M riboflavin just prior to infection. The data represent the means and standard errors of the mean of three independent experiments. (D) Generation time of intracellularly growing bacteria in riboflavin-sufficient and -deprived BMMs between 2 to 5 h. Negative values indicate that the number of recoverable bacteria was decreasing over time.

**Table S1. Bacterial strains used in this study**

| <i>Strains</i>                                       | <i>Strain number</i> | <i>Reference</i> |
|------------------------------------------------------|----------------------|------------------|
| <i>Listeria monocytogenes</i>                        |                      |                  |
| Wild type                                            | 10403S               | 4                |
| $\Delta ribU$                                        | DP-L7376             | This study       |
| $\Delta ribU$ + pPL2-pNative <i>ribU</i>             | DP-L7377             | This study       |
| $\Delta ribU$ + pPL2-pNative <i>ribDEAHT</i>         | DP-L7378             | This study       |
| $\Delta hly$                                         | DP-L2161             | 5                |
| Wild type + pPL2-Holin/Lysin                         | DP-L5961             | 6                |
| Wild type + pPL2- <i>L.p. flaA</i>                   | DP-L5964             | 7                |
| $\Delta ribC$                                        | DP-L7379             | This study       |
| $\Delta ribF$                                        | DP-L7380             | This study       |
| $\Delta ribC/\Delta ribF$                            | DP-L7381             | This study       |
| $\Delta ribC/\Delta ribF$ + pPL2-pNative <i>ribC</i> | DP-L7382             | This study       |
| <i>Escherichia coli</i>                              |                      |                  |
| SM10 pPL2-pNative <i>ribU</i>                        | DP-E7383             | This study       |
| SM10 pPL2-pNative <i>ribDEAHT</i>                    | DP-E7384             | This study       |
| SM10 pPL2-pNative <i>ribC</i>                        | DP-E7385             | This study       |
| SM10 pKSV7 <i>ribU</i>                               | DP-E7204             | This study       |
| SM10 pKSV7 <i>ribC</i>                               | DP-E7386             | This study       |
| SM10 pKSV7 <i>ribF</i>                               | DP-E7387             | This study       |

## SI References

1. N. K. Karpowich, J. M. Song, N. Cocco, D.-N. Wang, ATP binding drives substrate capture in an ECF transporter by a release-and-catch mechanism. *Nat. Struct. Mol. Biol.* **22**, 565–571 (2015).
2. A. Matern, D. Pedrolli, S. Großhennig, J. Johansson, M. Mack, Uptake and metabolism of antibiotics roseoflavin and 8-demethyl-8-aminoriboflavin in riboflavin-auxotrophic *Listeria monocytogenes*. *J. Bacteriol.* **198**, 3233–3243 (2016).
3. M. Sebastián, S. Arilla-Luna, J. Bellalou, I. Yruela, M. Medina, The Biosynthesis of Flavin Cofactors in *Listeria monocytogenes*. *J. Mol. Biol.* **431**, 2762–2776 (2019).
4. C. Bécavin, *et al.*, Comparison of Widely Used *Listeria monocytogenes* Strains EGD, 10403S, and EGD-e Highlights Genomic Differences Underlying Variations in Pathogenicity. *MBio* **5** (2014).
5. S. Jones, D. A. Portnoy, Characterization of *Listeria monocytogenes* Pathogenesis in a Strain Expressing Perfringolysin O in Place of Listeriolysin O. *Infect. Immun.*, 5608–5613 (1994).
6. J. D. Sauer, *et al.*, *Listeria monocytogenes* Triggers AIM2-Mediated Pyroptosis upon Infrequent Bacteriolysis in the Macrophage Cytosol. *Cell Host Microbe* **7**, 412–419 (2010).
7. J.-D. Sauer, *et al.*, *Listeria monocytogenes* engineered to activate the Nlr4 inflammasome are severely attenuated and are poor inducers of protective immunity. *Proc. Natl. Acad. Sci.* **108**, 12419–12424 (2011).
